# Supplementary material for: Interleukin 17 and peripheral IL-17-expressing T cells are negatively correlated with the overall survival of head and neck cancer patients
Source: PubMed Central journal article supplement (PMC5839404; doi:10.18632/oncotarget.23934), 2018-01-03
Supplement: oncotarget-09-9825-s001.pdf [file oncotarget-09-9825-s001.pdf]

## Interleukin 17 and peripheral IL-17-expressing T cells are negatively correlated with the overall survival of head and neck cancer patients

### SUPPLEMENTARY MATERIALS

**Supplementary Table 1: Associations of IL-17-expressing T cells in PBMC with clinical and pathologic features for HNC patients**

| Characteristics                 | No. of HNC (%) | CD4+IL17+/CD4 (%) |             |                       | CD8+IL17+/CD8 (%) |             |          |
|---------------------------------|----------------|-------------------|-------------|-----------------------|-------------------|-------------|----------|
|                                 |                | mean              | (min-max)   | <i>p</i> <sup>c</sup> | mean              | (min-max)   | <i>p</i> |
| Age (years)                     |                |                   |             |                       |                   |             |          |
| 50                              | 58 (48.3)      | 3.45              | (0.60–9.03) | 0.907                 | 2.40              | (0.41–8.57) | 0.669    |
| 50                              | 62 (51.7)      | 3.48              | (0.84–7.37) |                       | 2.28              | (0.18–7.49) |          |
| Gender                          |                |                   |             |                       |                   |             |          |
| Male                            | 99 (82.5)      | 3.63              | (0.60–9.03) | 0.019                 | 2.44              | (0.18–8.57) | 0.139    |
| Female                          | 21 (17.5)      | 2.68              | (1.06–5.21) |                       | 1.87              | (0.22–7.53) |          |
| T classification <sup>a,b</sup> |                |                   |             |                       |                   |             |          |
| T1+T2                           | 75 (62.5)      | 3.15              | (0.60–9.03) | 0.008                 | 2.13              | (0.22–7.53) | 0.063    |
| T3+T4                           | 45 (37.5)      | 3.99              | (0.84–8.17) |                       | 2.69              | (0.18–8.57) |          |
| N classification <sup>a,b</sup> |                |                   |             |                       |                   |             |          |
| N0                              | 45 (37.5)      | 3.15              | (1.06–7.27) | 0.115                 | 2.32              | (0.18–8.57) | 0.921    |
| N+                              | 75 (62.5)      | 3.65              | (0.60–9.03) |                       | 2.35              | (0.41–7.53) |          |
| Overall stage <sup>a,b</sup>    |                |                   |             |                       |                   |             |          |
| I+II                            | 44 (36.7)      | 2.83              | (1.06–6.40) | 0.002                 | 2.15              | (0.22–6.45) | 0.320    |
| III+IV                          | 76 (74.3)      | 3.83              | (0.60–9.03) |                       | 2.45              | (0.18–8.57) |          |

<sup>a</sup>Pathological T/N classification and stage for oral cavity cancer.

<sup>b</sup>Clinical T/N classification and stage for oral pharyngeal, laryngeal, and hypopharyngeal cancer.

<sup>c</sup>P values were determined by *t* test.

**Supplementary Table 2: Levels of inflammatory cytokines produced from PBMC contributing to HNC clinicopathologic status**

|                     | TNF              | IL-10               | IFN- $\gamma$    | IP-10             | MIG               | MCP1              |
|---------------------|------------------|---------------------|------------------|-------------------|-------------------|-------------------|
| Healthy donor       | 2129 $\pm$ 569.8 | 55.77 $\pm$ 16.14   | 6134 $\pm$ 1763  | 25.64 $\pm$ 11.49 | 30.08 $\pm$ 11.02 | 115.9 $\pm$ 58.75 |
| HNC                 | 1675 $\pm$ 211.4 | 21.67 $\pm$ 3.42**  | 11473 $\pm$ 1971 | 26.98 $\pm$ 6.755 | 26.26 $\pm$ 5.0   | 422.2 $\pm$ 82.92 |
| Early stage (I+II)  | 1909 $\pm$ 354.5 | 20.7 $\pm$ 4.89*    | 9137 $\pm$ 3750  | 30.16 $\pm$ 11.46 | 30.48 $\pm$ 9.22  | 301.3 $\pm$ 105.1 |
| Late stage (III+IV) | 1537 $\pm$ 264.2 | 22.24 $\pm$ 4.647** | 12852 $\pm$ 2231 | 25.1 $\pm$ 8.45   | 23.77 $\pm$ 5.85  | 494.7 $\pm$ 115.8 |

<sup>a</sup>Healthy donor *n* = 11, Early stage *n* = 23, Advanced stage *n* = 39.

<sup>b</sup>Data were presented as means  $\pm$  SEM (pg/mL).

<sup>c</sup>P value reflects *t* test analysis of cytokine values from HNC patients compared with healthy donors.

\**P* < 0.05, \*\**P* < 0.01, \*\*\**P* < 0.001

**Supplementary Table 3: Univariate and multivariate analysis of factors associated with overall survival in HNC**

| Variables                        | Univariate      |             |                      | Multivariate    |             |                      |
|----------------------------------|-----------------|-------------|----------------------|-----------------|-------------|----------------------|
|                                  | HR <sup>a</sup> | 95% CI      | P value <sup>b</sup> | HR <sup>b</sup> | 95% CI      | P value <sup>c</sup> |
| Age (years, > 50 vs. ≤ 50)       | 1.475           | 0.728–2.987 | 0.281                |                 |             |                      |
| Gender (female vs. male)         | 0.624           | 0.276–1.413 | 0.258                |                 |             |                      |
| T stage (T3+T4 vs. T1+T2)        | 2.260           | 1.094–4.670 | 0.028*               | 0.929           | 0.350–2.467 | 0.882                |
| Lymph node (N+ vs. N0)           | 2.090           | 1.002–4.357 | 0.049*               | 1.940           | 0.711–5.291 | 0.195                |
| TNM Stage (III+IV vs. I+II)      | 2.418           | 1.177–4.970 | 0.016*               | 1.484           | 0.432–5.096 | 0.531                |
| CD4+ IL-17+ cells (high vs. low) | 2.095           | 1.032–4.253 | 0.041*               | 1.566           | 0.711–3.449 | 0.266                |
| CD8+ IL-17+ cells (high vs. low) | 2.568           | 1.260–5.231 | 0.009**              | 1.839           | 0.782–4.321 | 0.162                |
| IL-17+ cells (high vs. low)      | 2.591           | 1.272–5.279 | 0.009**              | 2.010           | 0.886–4.556 | 0.095                |

<sup>a</sup>HR, hazard ratio; CI, confidence interval. HR > 1, risk for death increased; HR < 1, risk for death decreased.

<sup>b</sup>Log-rank test.

<sup>c</sup>Multivariate Cox proportional hazards regression model.

\*Statistically significant (\**P* < 0.05, \*\**P* < 0.01).

**Supplementary Table 4: Primer sequences used for real-time qPCR**

| Name                       | Forward primer             | Reverse primer                 |
|----------------------------|----------------------------|--------------------------------|
| Primers specific for human |                            |                                |
| <i>Il17ra</i>              | 5'-CTTCACCCTGTGGAACGAAT-3' | 5'-CTGAAGAAGGGCTGGATCTG-3'     |
| <i>Il6</i>                 | 5'-GAGACATGTAACAAGAGTAA-3' | 5'-AGGCAAGTCTCCTCAT-3'         |
| <i>Pcna</i>                | 5'-GCACTCAAGGACCTCATC-3'   | 5'-AACTTTCTCCTGGTTTGG-3'       |
| <i>Mmp2</i>                | 5'-TGGCAAGTACGGCTTCTGTC-3' | 5'-TTCTTGTCGCGGTCGTAGTC-3'     |
| <i>Ki67</i>                | 5'-ACGAGACGCTGGTTACTATC-3' | 5'-GCTCATCAATAACAGACCCATTAC-3' |
| <i>Vegf-a</i>              | 5'-CTTGCCTTGCTGCTCTACC-3'  | 5'-CACACAGGATGGCTTGAAG-3'      |

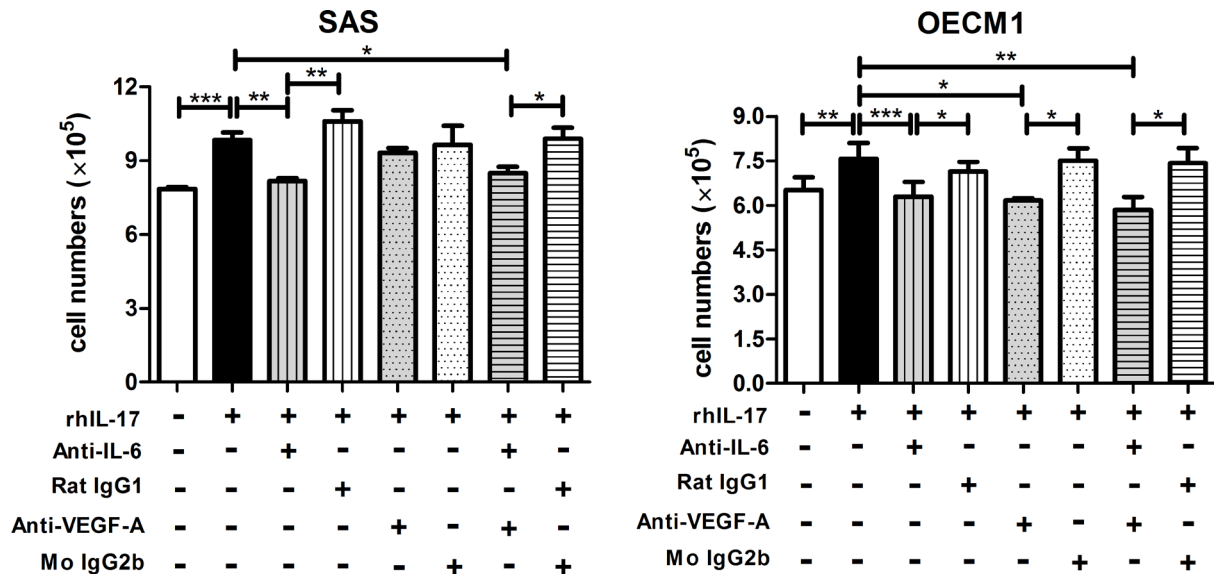

**Supplementary Figure 1: Neutralizing IL-6 and VEGF-A by using blocking mAb significantly reduced IL-17-induced cell growth of OSCC cells.** The neutralization of endogenous IL-6 or VEGF-A produced by rhIL-17-treated OSCC cells. SAS and OECM-1 cells were treated with 100ng/mL rhIL-17 and either 0.1 $\mu$ g/mL neutralization antibodies (anti-IL-6 and anti-VEGF) or isotype control antibodies (rat IgG1 and mouse IgG2b) for 48 h, and the proliferation rates analyzed by cell counting using trypan blue exclusion. All results represent the mean  $\pm$  SEM of at least four independent experiments (\* $P$  < 0.05, \*\* $P$  < 0.01, \*\*\* $P$  < 0.001).

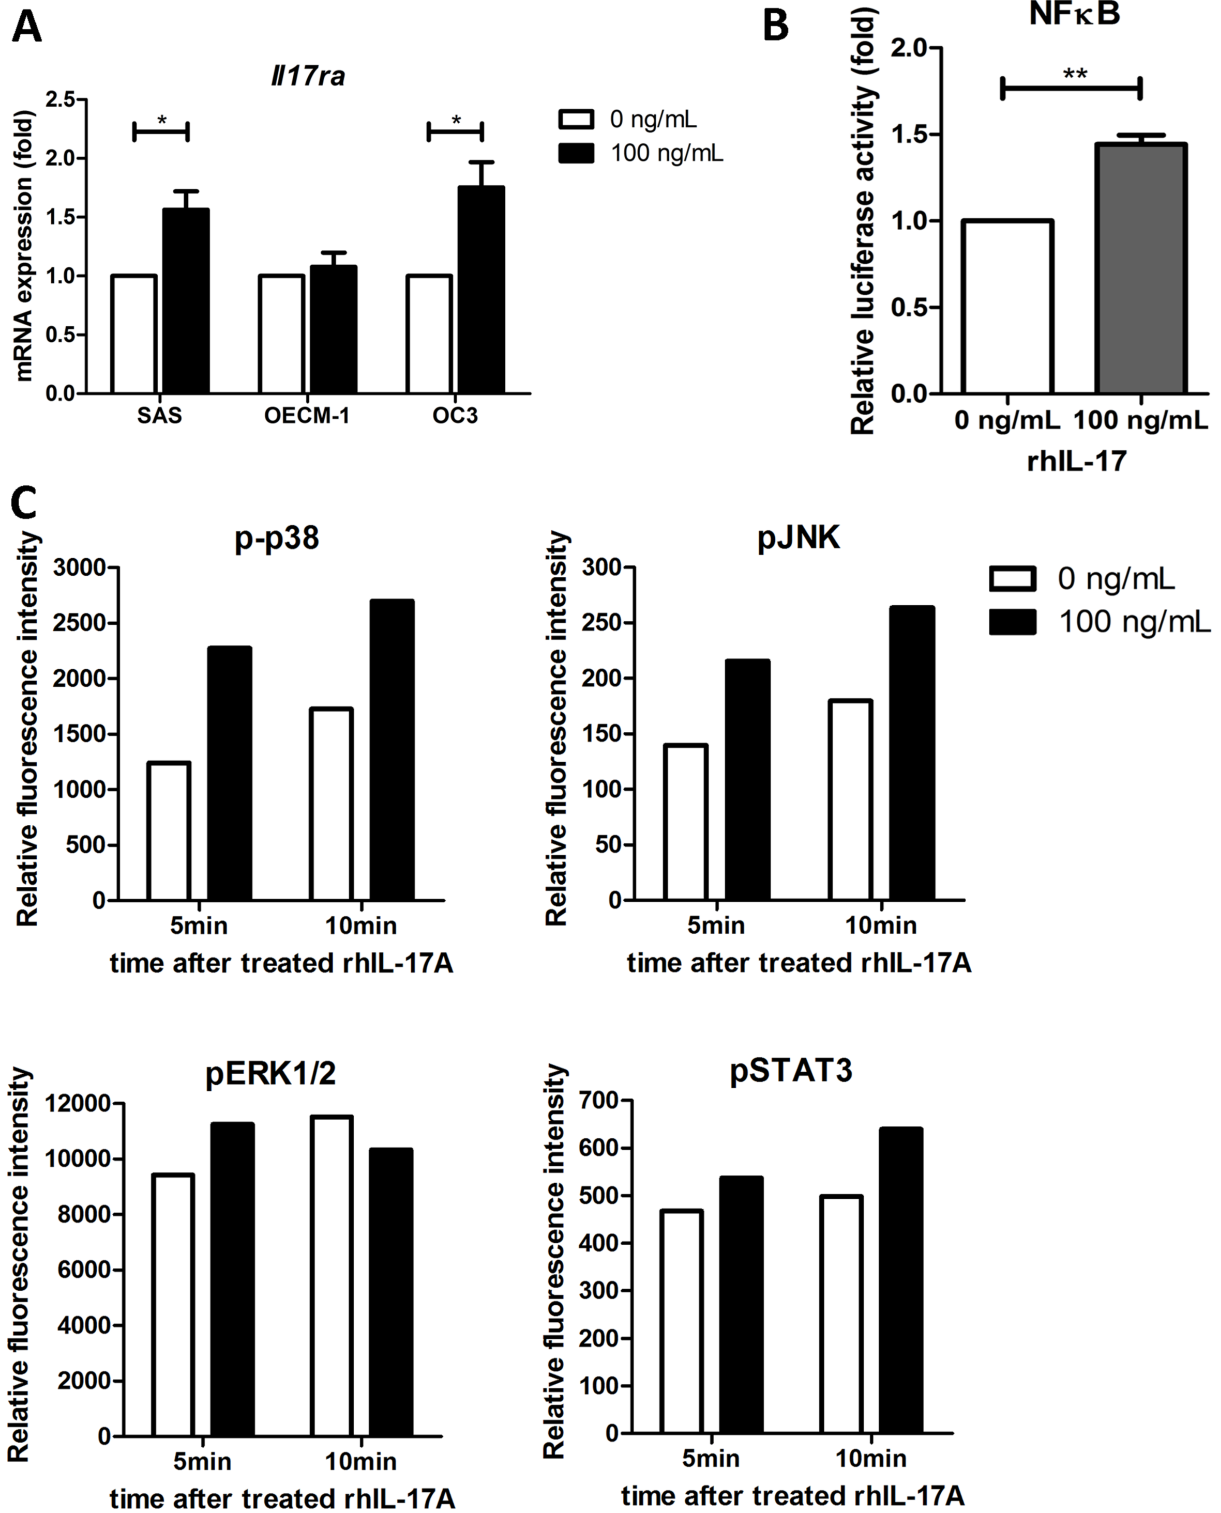

**Supplementary Figure 2: Cell signaling analysis of IL-17-stimulated SAS cells.** (A) The expression levels of *Il-17ra* from IL-17-stimulated OSCC cell lines were measured by qRT-PCR and graphed as relative fold over untreated. (B) SAS cell was transfected with NF- $\kappa$ B promoter-luciferase plasmid, cultured in the presence or absence of 100 ng/ml rhIL-17 for 6h, and luciferase activity was measured to assess the NF- $\kappa$ B activity. Data are representatives of five experiments and shown as mean  $\pm$  SEM. (C) Cell signaling analysis of IL-17-stimulated SAS cells for the indicated times. The phosphorylation of protein levels was quantified using cell signaling multiplex assay.

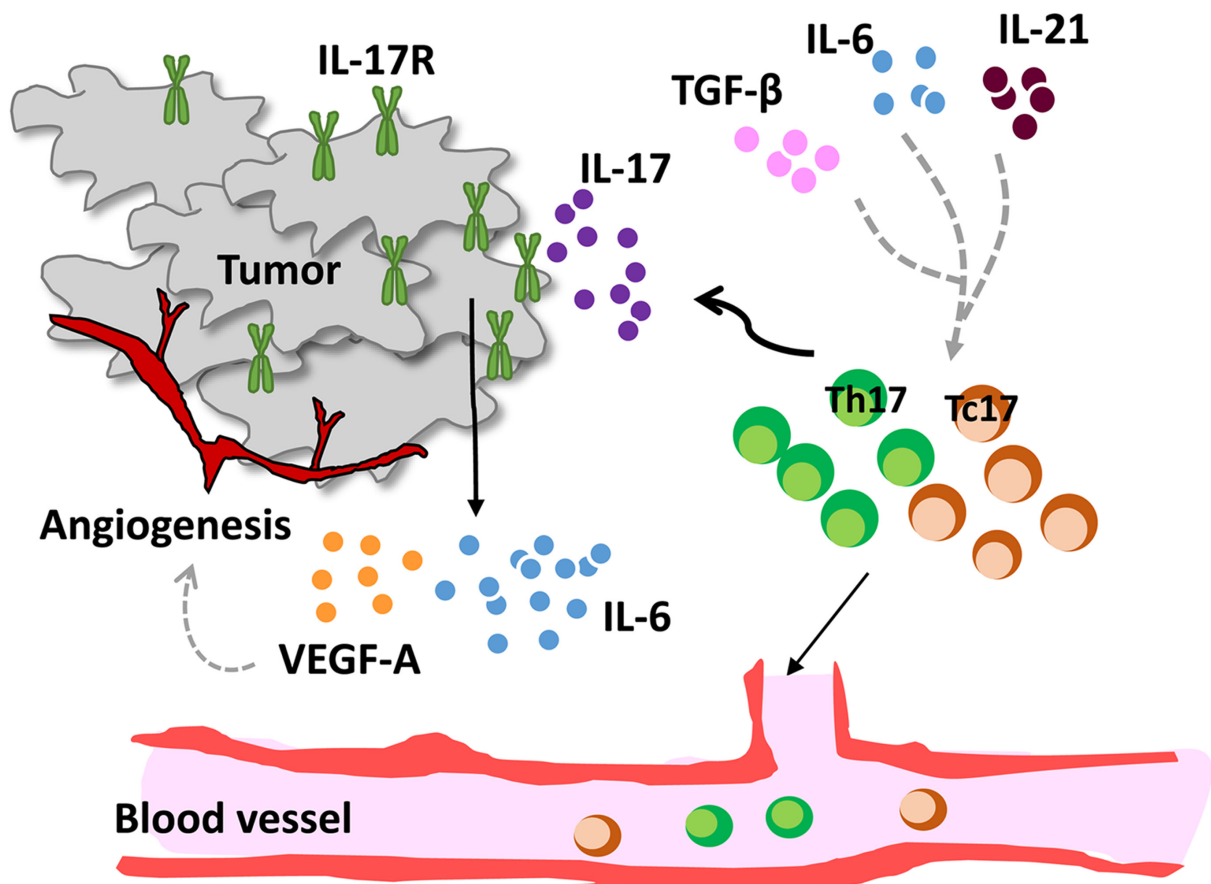

**Supplementary Figure 3: The schematic diagram demonstrates the possible mechanisms of IL-17 contributing to HNC progression and of some Th17 and Tc17 releasing into the periphery.** As tumors develop and progress, the induced production of TGF- $\beta$ , IL-21 and/or IL-6 by PBMCs promotes the differentiation of Th17/Tc17 cells, which produce a large quantity of IL-17. In the tumor microenvironment, IL-17 acts on tumor cells to stimulate the expression of IL-6 and VEGF-A, which consequently enhances Th17 differentiation in a positive feedback loop and creates a sustained chronic inflammatory state that favors tumor growth and angiogenesis. As tumor progression, the abundantly elicited IL-17-expressing cells, including Th17 and Tc17 cells, released into circulation and could be found in peripheral blood of patients with HNC.
